# Supplementary material for: Low birefringence and low dispersion aliphatic thermosets with a high and tunable refractive index
Source: Royal Society of Chemistry journal article supplement (doi:10.1039/d2py01327d), 2023-01-01
Supplement: d2py01327d1.pdf [file d2py01327d1.pdf]

## Supporting Information

### **Low Birefringence, Low Dispersion Aliphatic Thermosets with High and Tunable Refractive Index**

*Yujin Jeon,<sup>†</sup> Jisung Choi,<sup>†</sup> Donghwa Seo, Soon Hwa Jung, and Jeewoo Lim,<sup>\*</sup>*

<sup>†</sup>These authors contributed equally.

<sup>\*</sup>(J.L.) E-mail: jeewoo@khu.ac.kr

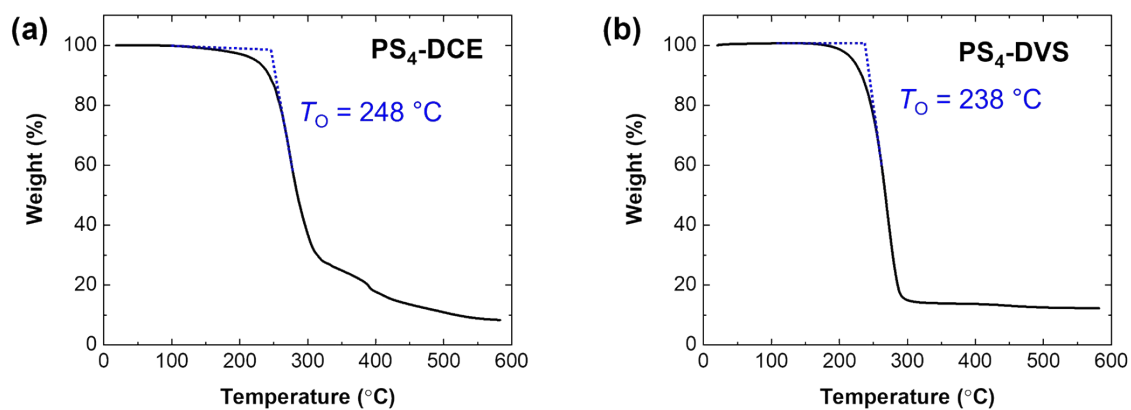

**Figure S1.** Thermogravimetric analyses (TGA) of PS<sub>4</sub>-DCE (a) and PS<sub>4</sub>-DVS (b) prepolymers used for the preparation of p(PS-BEPS).  $T_O$  is the degradation onset temperature.

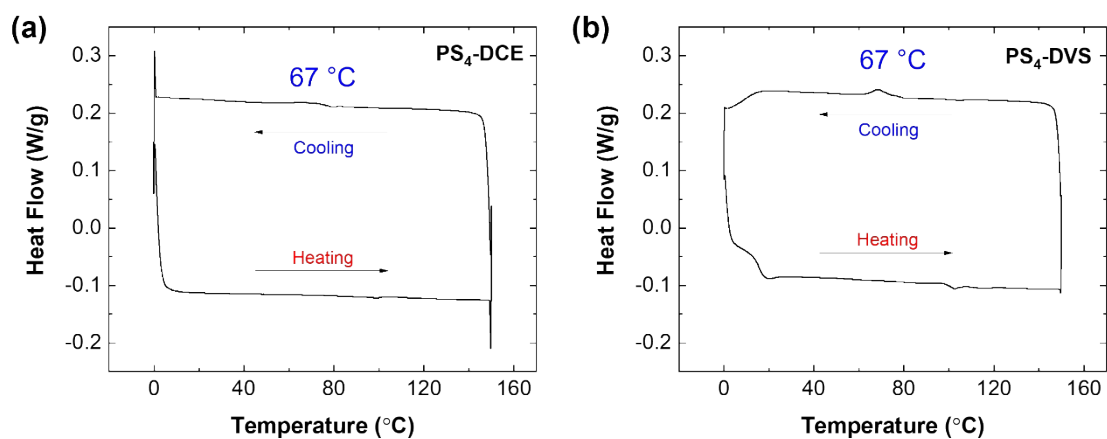

**Figure S2.** Differential scanning calorimetry (DSC) of PS<sub>4</sub>-DCE (a) and PS<sub>4</sub>-DVS (b) prepolymers used for the preparation of p(PS-BEPS).

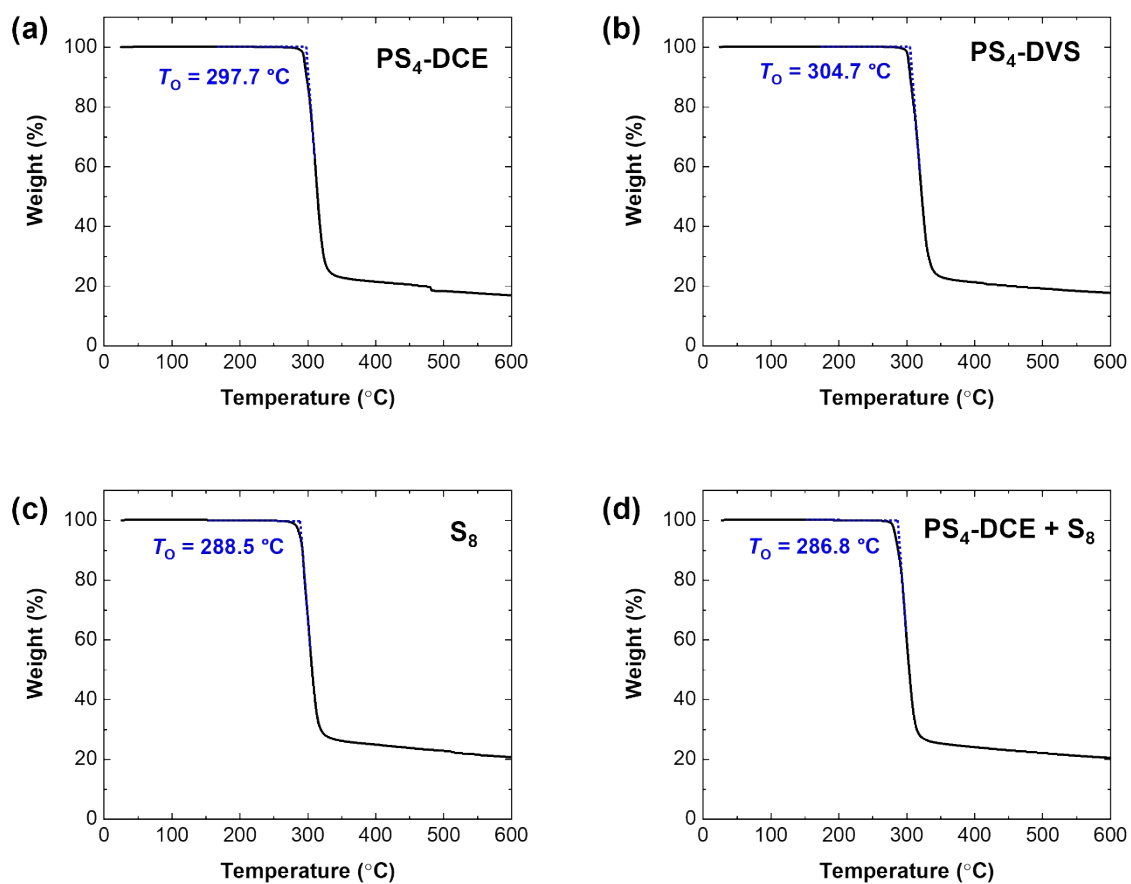

**Figure S3.** Thermogravimetric analyses (TGA) of p(PS-BEPS) obtained from 15 wt.% of PS<sub>4</sub>-DCE (a), PS<sub>4</sub>-DVS (b), 15 wt.% elemental sulfur (c), and 15 wt.% each of PS<sub>4</sub>-DCE and elemental sulfur (d).  $T_0$  is the degradation onset temperature.

**Table S1.** Refractive indices of p(PS-BEPS)s with various additive polymer content measured using TE and TM polarized light and their birefringence.

| <b>Additive Polymer</b>   | <b>Content in BEPS (wt. %)</b> | <b><i>n</i> (TE)*</b> | <b><i>n</i> (TM)*</b> | <b>Birefringence</b> |
|---------------------------|--------------------------------|-----------------------|-----------------------|----------------------|
| <b>PS<sub>4</sub>-DVS</b> | 2.5                            | 1.6996                | 1.6976                | 0.0023               |
|                           | 5                              | 1.7004                | 1.6980                | 0.0024               |
|                           | 7.5                            | 1.7009                | 1.6988                | 0.0021               |
|                           | 10                             | 1.7018                | 1.6999                | 0.0019               |
|                           | 12.5                           | 1.7023                | 1.7005                | 0.0018               |
|                           | 15                             | 1.7030                | 1.7013                | 0.0017               |
| <b>PS<sub>4</sub>-DCE</b> | 2.5                            | 1.7015                | 1.6998                | 0.0017               |
|                           | 5                              | 1.7032                | 1.7021                | 0.0011               |
|                           | 7.5                            | 1.7050                | 1.7033                | 0.0017               |
|                           | 10                             | 1.7073                | 1.7056                | 0.0017               |
|                           | 12.5                           | 1.7100                | 1.7085                | 0.0015               |
|                           | 15                             | 1.7120                | 1.7105                | 0.0015               |

\*Refractive index values were measured at 632.8 nm.

**Table S2.** Refractive indices of p(PS-BEPS)s with various additive chalcogenide content measured using TE and TM polarized light and their birefringence.

| <b>Additive Polymer</b> | <b>Content in BEPS (wt. %)</b> | <b><i>n</i> (TE)*</b> | <b><i>n</i> (TM)*</b> | <b>Birefringence</b> |
|-------------------------|--------------------------------|-----------------------|-----------------------|----------------------|
| <b>S<sub>8</sub></b>    | 2.5                            | 1.7025                | 1.7004                | 0.0021               |
|                         | 5                              | 1.7059                | 1.7046                | 0.0013               |
|                         | 7.5                            | 1.7098                | 1.7079                | 0.0019               |
|                         | 10                             | 1.7143                | 1.7128                | 0.0015               |
|                         | 12.5                           | 1.7178                | 1.7159                | 0.0019               |
|                         | 15                             | 1.7221                | 1.7201                | 0.002                |

\*Refractive index values were measured at 632.8 nm.

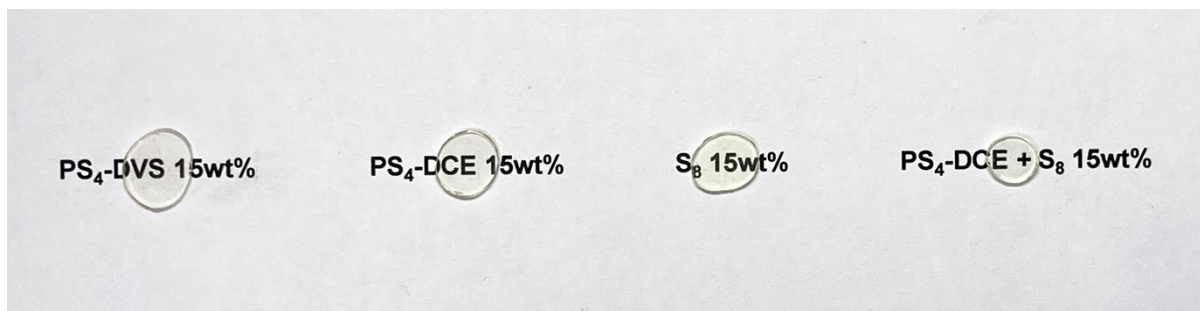

**Figure S4.** Digital image of films (thickness = 1 mm) of p(PS-BEPS) and p(S-BEPS) obtained from polysulfide polymers, elemental sulfur, and a combination of PS<sub>4</sub>-DCE and elemental sulfur.

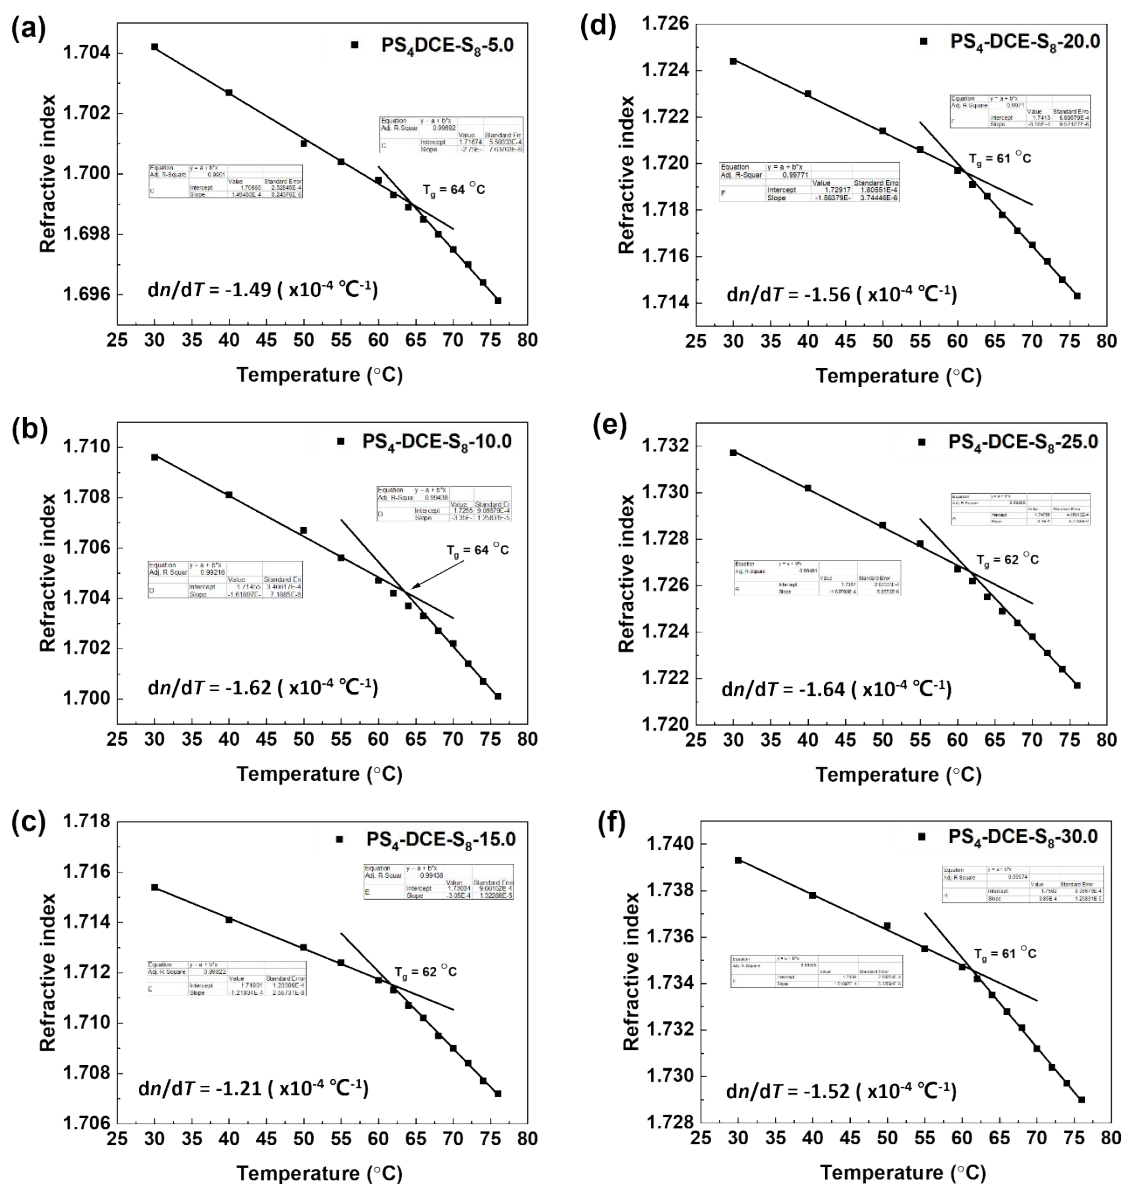

**Figure S5.**  $dn/dT$  curves of P1 (a), P2 (b), P3 (c), P4 (d), P5 (e), and P6 (f).
